# Supplementary material for: Growth Inhibitory and Pro-Apoptotic Effects of Hirsuteine in Chronic Myeloid Leukemia Cells through Targeting Sphingosine Kinase 1
Source: PubMed Central journal article supplement — Biomol Ther (Seoul). 2022 Jun 15;30(6):553–61. doi: 10.4062/biomolther.2022.023 (PMC9622316; doi:10.4062/biomolther.2022.023), 2022-06-15
Supplement: bt-30-6-553-supple.pdf [file bt-30-6-553-supple.pdf]

**Growth inhibitory and pro-apoptotic effects of Hirsuteine in Chronic Myeloid Leukemia cells through targeting Sphingosine kinase 1**

***Supplementary Material***

**Supplementary Table**

**Supplementary Table:** Primer sequence list

| <b>Gene</b>   | <b>Primer sequence</b>   |
|---------------|--------------------------|
| S1PR1 forward | GAGAACAGCATTAAACTGACC    |
| S1PR1 reverse | CCAGGATGATAAAGCAGCAG     |
| S1PR2 forward | CTAGCCAGTTCTGAAAGCC      |
| S1PR2 reverse | GGTATAATTATAGTGTTCTGGACC |
| S1PR3 forward | CCAAGCAGAAGTAAATCAAGCA   |
| S1PR3 reverse | CTTCCTTGACCTTCGGAGAG     |
| S1PR4 forward | CTACATCCTCTTCTGCCTG      |
| S1PR4 reverse | ATAGAGGCCCATGATGGTG      |
| S1PR5 forward | ATCTAGCCGTGTTGTTGGT      |
| S1PR5 reverse | CAGGAGTACAGGACAGGTG      |
| GAPDH forward | CATGAGAAGTATGACAACAGCCT  |
| GAPDH reverse | AGTCCTTCCACGATACCAAAGT   |

## Supplementary Figures

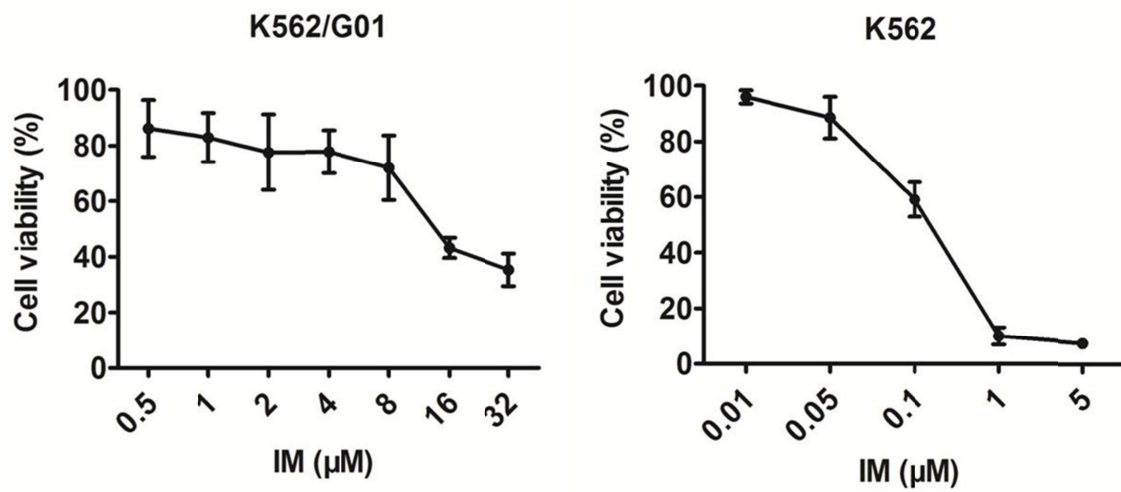

**Supplementary Figure 1:** The MDR characteristics of K562/G01 cells. K562 and K562/G01 cells were treated with indicated doses of Imatinib (IM) for 48 h, the cell viability was determined by MTT assay.

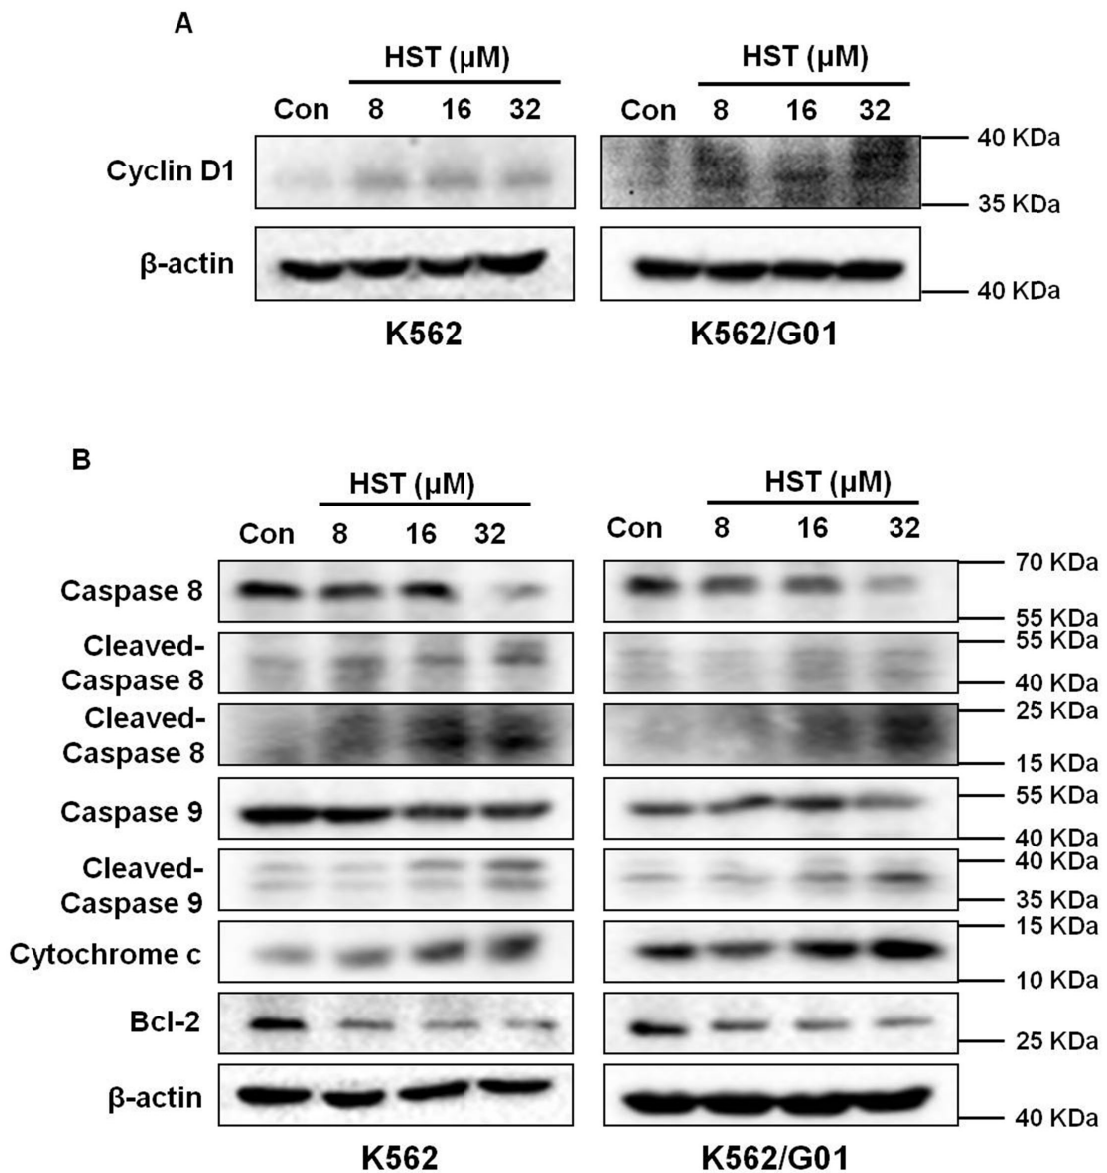

**Supplementary Figure 2:** Cell cycle arrest and pro-apoptotic effects of HST in CML cells. K562 and K562/G01 cells were treated with HST for 48 h, western blot was performed. (A) Cell cycle regulator, Cyclin D1, was determined. (B) Cell apoptosis effectors, Caspase 8, Caspase 9, Cytochrome c and Bcl-2, were determined.

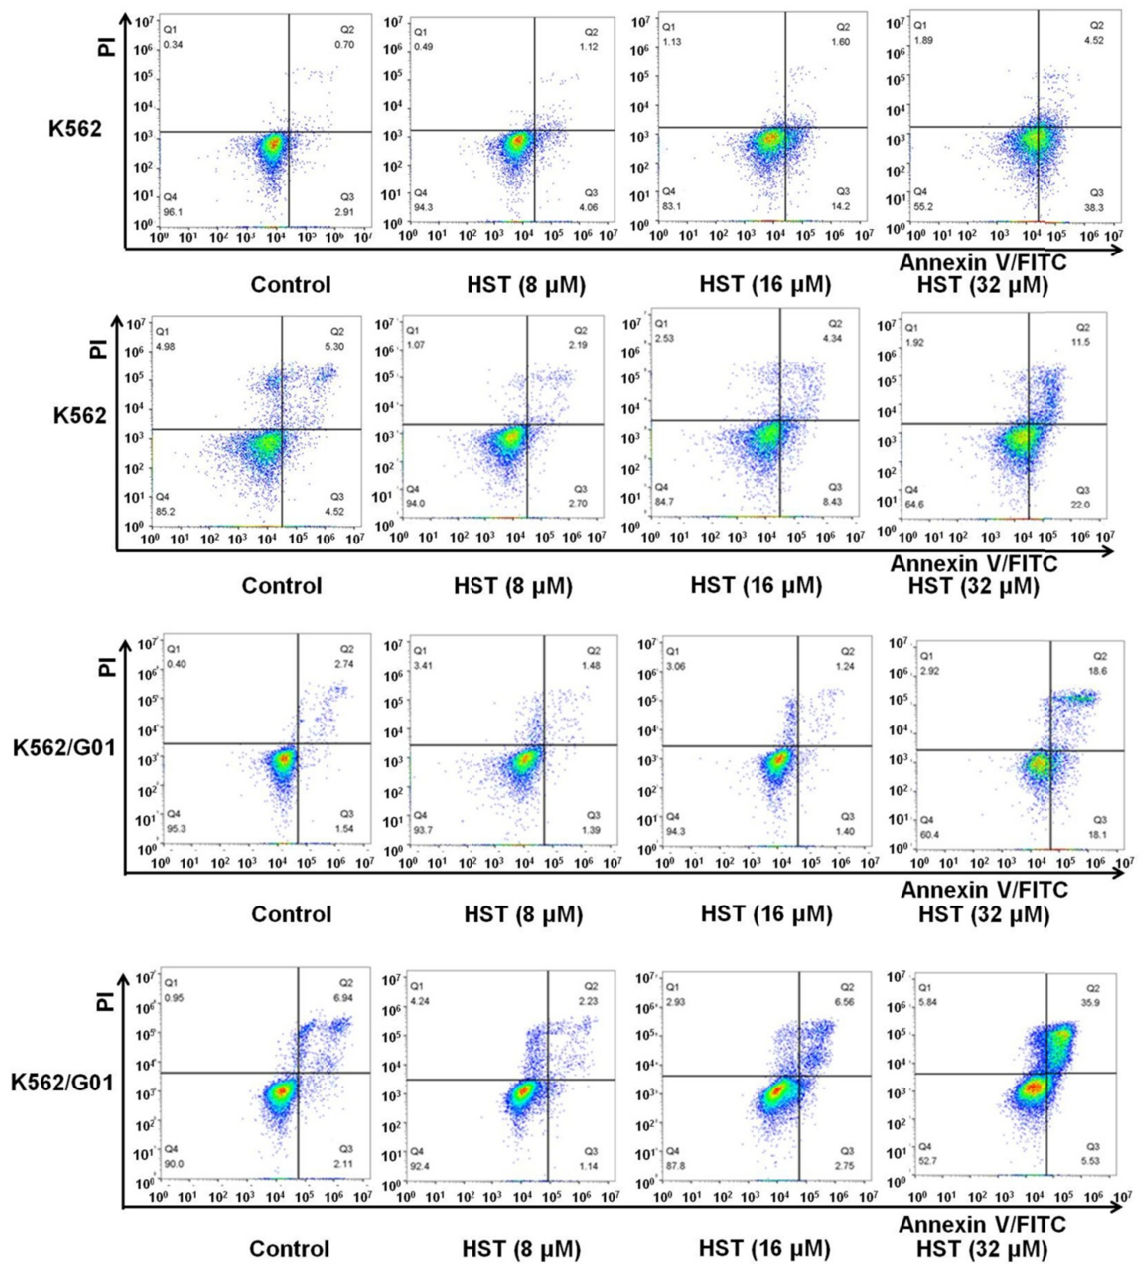

**Supplementary Figure 3:** Pro-apoptotic effect of HST in CML cells. K562 and K562/G01 cell apoptosis were analyzed by flow cytometry after 48 h-treatment of increasing HST.

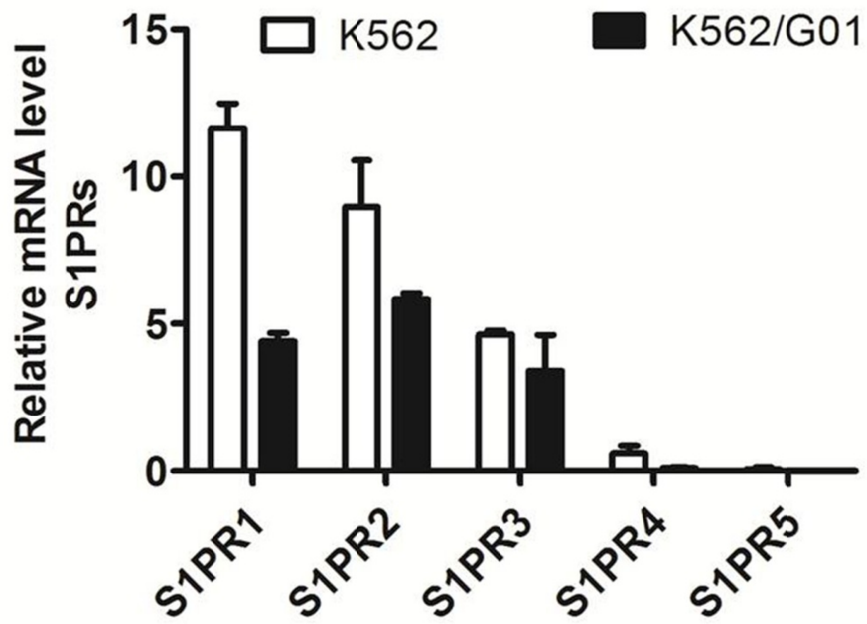

**Supplementary Figure 4:** S1PRs levels in CML cells. S1PR1-5 expression levels of K562 and K562/G01 cells were analyzed by qRT-PCR.
